# Supplementary material for: Study of Transcriptional Effects in Cis at the IFIH1 Locus
Source: PLoS One. 2010 Jul 13;5(7):e11564. doi: 10.1371/journal.pone.0011564 (PMC2903489; doi:10.1371/journal.pone.0011564)
Supplement: Table S1 — Primer sequences and probes for each SNP (0.02 MB XLS) [file pone.0011564.s001.xls]

## Sheet: Sheet1
Table S1. Primer sequences and probes for each SNP
Gene	SNP		Sequence
IFIH1	rs1990760	T/C	(forward) 5'-GGAACTTTACATTGTAAGAG-3'
			(reverse) 5'-CTGGCCACATTTGCAGAT-3'
			(probe) 5'-CGGCACACTTCTTTTGCAGTG-3'
GCA	rs7587426	C/T	(forward) 5'-TTCTCAGCCTGGAAACTCCT-3'
			(reverse) 5'-TTCCCAAAAAGTTCAGCAAAA-3'
			(probe) 5'-CAAAAAGCATTCCAAGAAACA-3'
FAP	rs2075302	C/T	(forward) 5'-AAGAGCTTGGACCAAATTTCA-3'
			(reverse) 5'-CCGCAAAATCTCAAGCTCAT-3'
			(probe) 5'-TTCTTTAAATATAGCAGTCA-3'
KCNH7	rs2068330	C/G	(forward) 5'-ACAAAAATGAGGGGGAAAGG-3'
			(reverse) 5'-CCATAGACCCCGAACTTGAA-3'
			(probe) 5'-GTTGTGATCCCTTTTCATATA-3'
